# Supplementary material
Source: HighWire-hosted journal article supplement (https://bmjophth.bmj.com/content/8/1/e001360)
Supplement: inline-supplementary-material-1 [file inline-supplementary-material-1.pdf]

**Table S1. Clinical data and background of each patient**

| Age range | Sex | Allergic conjunctivitis | Oral medicine allergy | Follow-up period (month) |
|-----------|-----|-------------------------|-----------------------|--------------------------|
| 40s       | F   | +                       | none                  | 48                       |
| 70s       | F   | —                       | none                  | 22                       |
| 20s       | F   | —                       | none                  | 18                       |
| 90s       | F   | —                       | none                  | 93                       |
| 40s       | F   | —                       | pyrazolone drug       | 20                       |
| 70s       | F   | —                       | none                  | 7                        |
| 70s       | F   | +                       | none                  | 23                       |
| 80s       | F   | —                       | none                  | 63                       |
| 50s       | F   | +                       | none                  | 74                       |
| 70s       | M   | —                       | none                  | 86                       |
| 50s       | M   | —                       | none                  | 57                       |
| 70s       | M   | —                       | none                  | 53                       |
| 70s       | F   | —                       | none                  | 89                       |
| 70s       | M   | —                       | none                  | 64                       |
| 50s       | F   | +                       | none                  | 66                       |
| 50s       | F   | +                       | none                  | 15                       |
| 60s       | M   | +                       | none                  | 90                       |
| 60s       | F   | +                       | none                  | 85                       |
| 50s       | M   | —                       | none                  | 93                       |
| 40s       | F   | —                       | none                  | 48                       |
| 40s       | F   | +                       | nifedipine            | 7                        |
| 60s       | M   | —                       | none                  | 55                       |
| 60s       | F   | —                       | none                  | 65                       |
| 50s       | F   | —                       | none                  | 5                        |
| 50s       | F   | —                       | none                  | 5                        |

F=female; M=male
